# Supplementary material
Source: MDPI journal article supplement (https://www.mdpi.com/2414-4088/5/8/45)
Supplement: s1 [file s1]

## Description of Video S1: Example section of the collaborative work task with HoloLens

The video sequence shows an example section of the collaborative work task on the molecule (3AID) [23] in the learning sequence of the study.

The blue structure depicts the peptide backbone (Cartoon representation). It is required by the students to identify alpha-helix and beta-sheet structures in this form of representation. In the second half of the video, the appearing sticks and balls representation is additionally displayed for identifying single amino acids.

Each colored sphere is the respective cursor of one participant which he or she controls individually by moving his or her head to place it in certain locations. This feature allows participants to show each other specific features within the Hologram. The small grey circle represents the individual working cursor, which acts like a traditional mouse cursor and is always in the center of the viewer's field.

English subtitles have been added. The subtitles were manually created in retrospect as a clarifying addition to the video. The colors of the subtitles match the colors of the cursors to facilitate identifying the correspondent speaker. Subtitles in grey refer to the teaching person.
